# Supplementary material for: Detection and control of Ganoderma boninense: strategies and perspectives
Source: PubMed Central journal article supplement (PMC3824713; doi:10.1186/2193-1801-2-555), 2013-10-24
Supplement: 40064_2013_610_MOESM1_ESM.pdf [file 40064_2013_610_MOESM1_ESM.pdf]

|           |       |                                                                                                                                          |     |     |
|-----------|-------|------------------------------------------------------------------------------------------------------------------------------------------|-----|-----|
|           |       | 1                                                                                                                                        |     | 135 |
| BD082757  | (1)   | [Redacted]                                                                                                                               |     |     |
| BD082758  | (1)   | [Redacted]                                                                                                                               |     |     |
| BD082759  | (1)   | [Redacted] A [Redacted] G [Redacted] ----                                                                                                |     |     |
| Consensus | (1)   | AAGGATCATTATCGAGTTTGGACTGGGTTGTAGCTGGCCTTCCGAGGCATCGTGCACGCCCTGCTCATCCACTCTACACCTGTGCACTTACTGTGGGTTATAGATCGTGTGGAGCGAGCTCGTTTCGTTTGACGAG |     |     |
|           |       | 136                                                                                                                                      |     | 270 |
| BD082757  | (136) | [Redacted]                                                                                                                               |     |     |
| BD082758  | (136) | [Redacted] C [Redacted]                                                                                                                  |     |     |
| BD082759  | (132) | [Redacted] T [Redacted]                                                                                                                  |     |     |
| Consensus | (136) | TTCGCGAAGCGCGTCTGTGCCTGCGTTTATCACAAACACTATAAAGTATTAGAAATGTGTATTGCGATGTAACGCATCTATATACAACCTTCAGCAACGGATCTCTTGGCTCTCGCATCGATGAAGAACGCAGCG  |     |     |
|           |       | 271                                                                                                                                      |     | 405 |
| BD082757  | (271) | [Redacted] T [Redacted]                                                                                                                  |     |     |
| BD082758  | (271) | [Redacted]                                                                                                                               |     |     |
| BD082759  | (267) | [Redacted]                                                                                                                               |     |     |
| Consensus | (271) | AAATGCGATAAGTAATGTGAATTGCAGAATTCAGTGAATCATCGAATCTTGAAACGCACCTTGCGCTCCTTGGTATTCCGAGGAGCATGCCTGTGTGAGTGTGCATGAAATCTTCAACCTACAATCTCTTTGCGGT |     |     |
|           |       | 406                                                                                                                                      |     | 540 |
| BD082757  | (406) | [Redacted]                                                                                                                               |     |     |
| BD082758  | (406) | [Redacted]                                                                                                                               |     |     |
| BD082759  | (402) | [Redacted]                                                                                                                               |     |     |
| Consensus | (406) | TTTGTAGGCTTGGACTTGGAGGCTTGTCCGGTCTTTTATTGATCGGCTCCTCTCAAATGCATTAGCTTGGTTCCTTTGCGAATGGCTGTCCGGTGTGATAATGTCTACGCCGCGACCGTGACGCGTTTGGCGAGC  |     |     |
|           |       | 541                                                                                                                                      | 616 |     |
| BD082757  | (541) | [Redacted]                                                                                                                               |     |     |
| BD082758  | (541) | [Redacted] G [Redacted]                                                                                                                  |     |     |
| BD082759  | (537) | [Redacted]                                                                                                                               |     |     |
| Consensus | (541) | TTCTAACCGTCCCGTTATTGGGACAACCTCTTATGACCTCTGACCTCAAATCAGGTAGGACTACCCGCTGAACTTAA                                                            |     |     |
