# Supplementary material for: Detection and control of Ganoderma boninense: strategies and perspectives
Source: Springerplus. 2013 Oct 24;2:555. doi: 10.1186/2193-1801-2-555 (PMC3824713; doi:10.1186/2193-1801-2-555)
Supplement: Supplementary file 3 — Authors’ original file for figure 3 [file 40064_2013_610_MOESM3_ESM.pdf]

|           |       |                                                                                                                                                 |     |     |
|-----------|-------|-------------------------------------------------------------------------------------------------------------------------------------------------|-----|-----|
|           |       | 1                                                                                                                                               |     | 135 |
| EU701010  | (1)   |                                                                                                                                                 |     |     |
| EU841913  | (1)   |                                                                                                                                                 |     |     |
| X78749    | (1)   | -----C-CTCCGAGGCATCGTGCACGCCCTGCTCATCCACTCTACACCTGTGCACTTACTGTGGGTTATAGATCGTGTGGA                                                               |     |     |
| Consensus | (1)   | <u>CCTTCCGTAGGTGAACCTGCGGAAGGATCATTATCGAGTTT</u> TGACTGGGTTGTAGCTGGCCTTCCGAGGCATCGTGCACGCCCTGCTCATCCACTCTACACCTGTGCACTTACTGTGGGTTATAGATCGTGTGGA |     |     |
|           |       | 136                                                                                                                                             |     | 270 |
| EU701010  | (136) |                                                                                                                                                 |     |     |
| EU841913  | (136) |                                                                                                                                                 |     |     |
| X78749    | (115) | G-----ACGCCTAGTT-CTGCGGTTTATCACAACACTATAAAGTATTAGAAATGTGTATTGCGATGTAACGCATCTATATACAACCTTTCAGCAACGGATCTCTTGGCTCT                                 |     |     |
| Consensus | (136) | GCGAGCTCGTTCTGTTTGAACGAGTTTGCGAAGCGCGTCTGTGCCTGCGTTTATCACAACACTATAAAGTATTAGAAATGTGTATTGCGATGTAACGCATCTATATACAACCTTTCAGCAACGGATCTCTTGGCTCT       |     |     |
|           |       | 271                                                                                                                                             | 297 |     |
| EU701010  | (271) |                                                                                                                                                 |     |     |
| EU841913  | (271) |                                                                                                                                                 |     |     |
| X78749    | (239) | -----                                                                                                                                           |     |     |
| Consensus | (271) | CGCATCGATGAAGAAGAACGCAGCAGG                                                                                                                     |     |     |
